# Supplementary material
Source: HighWire-hosted journal article supplement (https://injuryprevention.bmj.com/content/27/2/184)
Supplement: inline-supplementary-material-6 [file inline-supplementary-material-6.pdf]

**Supplemental 4:** Risk of Bias assessments

| Reference                       |     | Selection bias | Study design | Confounders bias | Blinding bias | Data collection | Withdrawal and drop-out | Global rating |
|---------------------------------|-----|----------------|--------------|------------------|---------------|-----------------|-------------------------|---------------|
| Lester et al. 1996              | S1  | Strong         | Moderate     | Weak             | Strong        | Weak            | Not Applicable          | WEAK          |
| Etzersdorfer et al. 1998        | S2  | Weak           | Moderate     | Weak             | Strong        | Weak            | Not Applicable          | WEAK          |
| Niederkröthenthaler et al. 2007 | S3  | Weak           | Moderate     | Strong           | Strong        | Strong          | Not Applicable          | MODERATE      |
| Till et al. 2013                | S4  | Strong         | Moderate     | Strong           | Strong        | Weak            | Not Applicable          | MODERATE      |
| Matsubayashi, Ueda, et al 2014  | S5  | Strong         | Moderate     | Strong           | Strong        | Moderate        | Not Applicable          | MODERATE      |
| Lockley et al. 2014             | S6  | Strong         | Moderate     | Strong           | Strong        | Strong          | Not Applicable          | STRONG        |
| Ross et al. 2020                | S7  | Moderate       | Weak         | Weak             | Strong        | Strong          | Not Applicable          | WEAK          |
| Hegerl et al. 2019              | S8  | Moderate       | Weak         | Strong           | Strong        | Strong          | Not Applicable          | MODERATE      |
| Hegerl et al. 2006              | S9  | Moderate       | Moderate     | Weak             | Strong        | Strong          | Not Applicable          | MODERATE      |
| Hegerl et al. 2010              | S10 | Moderate       | Moderate     | Strong           | Strong        | Strong          | Not Applicable          | MODERATE      |
| Szekely et al. 2013             | S11 | Moderate       | Moderate     | Weak             | Strong        | Strong          | Not Applicable          | MODERATE      |
| Motohashi et al. 2007           | S12 | Moderate       | Moderate     | Weak             | Strong        | Strong          | Not Applicable          | MODERATE      |
| King et al. 2005                | S13 | Moderate       | Moderate     | Strong           | Strong        | Strong          | Not Applicable          | MODERATE      |
| Stack et al. 2015               | S14 | Strong         | Moderate     | Strong           | Strong        | Weak            | Not Applicable          | MODERATE      |
| Studdert et al. 2010            | S15 | Strong         | Moderate     | Strong           | Strong        | Strong          | Not Applicable          | STRONG        |
| Nordentoft et al. 2006          | S16 | Strong         | Moderate     | Strong           | Strong        | Strong          | Not Applicable          | STRONG        |
| Nordentoft et al. 2007          | S17 | Strong         | Moderate     | Strong           | Strong        | Strong          | Not Applicable          | STRONG        |
| Pridemore et al. 2009           | S18 | Strong         | Moderate     | Strong           | Strong        | Strong          | Not Applicable          | STRONG        |
| Myung et al. 2012               | S19 | Strong         | Moderate     | Strong           | Strong        | Strong          | Not Applicable          | STRONG        |
| Cha et. 2015                    | S20 | Strong         | Moderate     | Strong           | Strong        | Strong          | Not Applicable          | STRONG        |
| Kim et al. 2017                 | S21 | Moderate       | Moderate     | Strong           | Strong        | Strong          | Not Applicable          | STRONG        |
| Yamasaki et al. 2005            | S22 | Strong         | Moderate     | Strong           | Strong        | Strong          | Not Applicable          | STRONG        |
| Morgan et al. 2007              | S23 | Strong         | Moderate     | Strong           | Strong        | Strong          | Not Applicable          | STRONG        |
| Hawton et al. 2013              | S24 | Strong         | Moderate     | Strong           | Strong        | Strong          | Not Applicable          | STRONG        |
| Lester et al. 1992              | S25 | Strong         | Moderate     | Strong           | Strong        | Strong          | Not Applicable          | STRONG        |
| Skilling et al. 2008            | S26 | Strong         | Moderate     | Strong           | Strong        | Strong          | Not Applicable          | STRONG        |
| Cylus et al. 2014               | S27 | Strong         | Moderate     | Strong           | Strong        | Strong          | Not Applicable          | STRONG        |

|                                |     |          |          |        |        |          |                |          |
|--------------------------------|-----|----------|----------|--------|--------|----------|----------------|----------|
| Kaufman et al. 2020            | S28 | Moderate | Weak     | Strong | Strong | Strong   | Not Applicable | MODERATE |
| Gertner et al. 2019            | S29 | Moderate | Weak     | Strong | Strong | Strong   | Not Applicable | MODERATE |
| Rambotti et al. 2020           | S30 | Moderate | Weak     | Strong | Strong | Strong   | Not Applicable | MODERATE |
| Birckmayer et al. 1999         | S31 | Strong   | Moderate | Strong | Strong | Weak     | Not Applicable | MODERATE |
| Grucza et 2012                 | S32 | Strong   | Moderate | Strong | Strong | Strong   | Not Applicable | STRONG   |
| Markowitz et al. 2003          | S33 | Strong   | Moderate | Strong | Strong | Strong   | Not Applicable | STRONG   |
| Son et al. 2011                | S34 | Strong   | Moderate | Weak   | Strong | Strong   | Not Applicable | MODERATE |
| Grucza et al. 2014             | S35 | Strong   | Moderate | Strong | Strong | Strong   | Not Applicable | STRONG   |
| Chapman et al., 2006           | S36 | Strong   | Moderate | Weak   | Strong | Moderate | Not Applicable | MODERATE |
| Baker et al., 2007             | S37 | Strong   | Moderate | Weak   | Strong | Moderate | Not Applicable | MODERATE |
| Klieve et al. 2009             | S38 | Strong   | Moderate | Weak   | Strong | Strong   | Not Applicable | MODERATE |
| Lee et al., 2010               | S39 | Strong   | Moderate | Weak   | Strong | Strong   | Not Applicable | MODERATE |
| McPhedran et al., 2012         | S40 | Strong   | Moderate | Weak   | Strong | Strong   | Not Applicable | MODERATE |
| Chapman et al. 2016            | S41 | Strong   | Moderate | Weak   | Strong | Strong   | Not Applicable | MODERATE |
| Gilmour et al. 2018            | S42 | Moderate | Weak     | Strong | Strong | Strong   | Not Applicable | MODERATE |
| Snowdown et al., 1992          | S43 | Strong   | Weak     | Weak   | Strong | Strong   | Not Applicable | MODERATE |
| Cantor et al., 1995            | S44 | Strong   | Moderate | Weak   | Strong | Strong   | Not Applicable | MODERATE |
| Ozanne-Smith et al. 2004       | S45 | Strong   | Moderate | Weak   | Strong | Strong   | Not Applicable | MODERATE |
| Kapusta et al., 2007           | S46 | Strong   | Moderate | Weak   | Strong | Strong   | Not Applicable | MODERATE |
| Niederkrötenhaler et al., 2009 | S47 | Strong   | Moderate | Strong | Strong | Strong   | Not Applicable | STRONG   |
| König et al. 2018              | S48 | Moderate | Moderate | Strong | Strong | Strong   | Not Applicable | STRONG   |
| Rich et al. 1990               | S49 | Strong   | Moderate | Weak   | Strong | Strong   | Not Applicable | MODERATE |
| Lester et al., 1993            | S50 | Strong   | Moderate | Weak   | Strong | Strong   | Not Applicable | MODERATE |
| Carrington et al., 1994        | S51 | Strong   | Moderate | Weak   | Strong | Strong   | Not Applicable | MODERATE |
| Leenaars et al., 1997          | S52 | Strong   | Moderate | Weak   | Strong | Strong   | Not Applicable | MODERATE |
| Bridges, 2004                  | S53 | Strong   | Moderate | Weak   | Strong | Strong   | Not Applicable | MODERATE |
| Caron, 2004                    | S54 | Strong   | Moderate | Strong | Strong | Strong   | Not Applicable | STRONG   |
| Caron et al. 2008              | S55 | Strong   | Moderate | Strong | Strong | Strong   | Not Applicable | STRONG   |
| Thomsen et al., 1991           | S56 | Strong   | Weak     | Weak   | Strong | Strong   | Not Applicable | WEAK     |
| Lubin et al. 2010              | S57 | Weak     | Moderate | Weak   | Strong | Weak     | Not Applicable | WEAK     |
| Beutrais et al. 2006           | S58 | Strong   | Moderate | Weak   | Strong | Strong   | Not Applicable | MODERATE |
| Ludwig et al., 2000            | S59 | Strong   | Moderate | Strong | Strong | Strong   | Not Applicable | STRONG   |
| Conner et al., 2003            | S60 | Weak     | Weak     | Strong | Strong | Weak     | Not Applicable | WEAK     |

|                                |     |          |          |        |        |          |                |          |
|--------------------------------|-----|----------|----------|--------|--------|----------|----------------|----------|
| Madhavan et al. 2019           | S61 | Moderate | Weak     | Strong | Strong | Strong   | Not Applicable | MODERATE |
| Cummings et al. 1997           | S62 | Strong   | Moderate | Strong | Strong | Strong   | Not Applicable | STRONG   |
| Sen et al., 2012               | S63 | Strong   | Moderate | Strong | Strong | Strong   | Not Applicable | STRONG   |
| Sloan et al. 1990              | S64 | Strong   | Weak     | Strong | Strong | Strong   | Not Applicable | MODERATE |
| Loftin et al. 1991             | S65 | Strong   | Moderate | Weak   | Strong | Strong   | Not Applicable | MODERATE |
| Crifasi et al. 2015            | S66 | Strong   | Moderate | Strong | Strong | Strong   | Not Applicable | STRONG   |
| Marinelli et al., 2013         | S67 | Strong   | Moderate | Weak   | Strong | Strong   | Not Applicable | MODERATE |
| Kivisto et al. 2018            | S68 | Moderate | Moderate | Strong | Strong | Strong   | Not Applicable | STRONG   |
| Castillo-Carniglia et al. 2019 | S69 | Moderate | Moderate | Strong | Strong | Strong   | Not Applicable | STRONG   |
| Rosengart et. 2005             | S70 | Strong   | Moderate | Strong | Strong | Strong   | Not Applicable | STRONG   |
| Rodriguez Andres et al., 2011  | S71 | Strong   | Moderate | Weak   | Strong | Strong   | Not Applicable | MODERATE |
| Fleegler et al. 2013           | S72 | Strong   | Moderate | Strong | Strong | Strong   | Not Applicable | STRONG   |
| Anestis, Khazem, et al. 2015   | S73 | Strong   | Weak     | Weak   | Strong | Moderate | Not Applicable | WEAK     |
| Anestis & Anestis, 2015        | S74 | Strong   | Weak     | Weak   | Strong | Moderate | Not Applicable | WEAK     |
| Anestis et al. 2017            | S75 | Strong   | Moderate | Weak   | Strong | Moderate | Not Applicable | MODERATE |
| Kaufman et al. 2018            | S76 | Moderate | Weak     | Strong | Strong | Strong   | Not Applicable | MODERATE |
| Anestis et al. 2019            | S77 | Moderate | Weak     | Strong | Strong | Strong   | Not Applicable | MODERATE |
| Siegel et al. 2019             | S78 | Moderate | Moderate | Strong | Strong | Strong   | Not Applicable | STRONG   |
| Ghiani et al. 2019             | S79 | Moderate | Weak     | Strong | Strong | Strong   | Not Applicable | MODERATE |
| Leung et al. 2019              | S80 | Moderate | Weak     | Strong | Strong | Strong   | Not Applicable | MODERATE |
| Ohberg et al. 1997             | S81 | Strong   | Moderate | Strong | Strong | Strong   | Not Applicable | STRONG   |
| Bellanger et al. 2006          | S82 | Strong   | Moderate | Weak   | Strong | Strong   | Not Applicable | MODERATE |
| Nakanishi et al. 2020          | S83 | Moderate | Moderate | Strong | Strong | Strong   | Not Applicable | STRONG   |
| Lee et al. 2018                | S84 | Moderate | Weak     | Strong | Strong | Strong   | Not Applicable | MODERATE |
| Baran et al. 2015              | S85 | Strong   | Moderate | Weak   | Strong | Strong   | Not Applicable | MODERATE |
| Lang et al. 2011               | S86 | Strong   | Moderate | Strong | Strong | Strong   | Not Applicable | STRONG   |
| Matsubayashi et al. 2011       | S87 | Strong   | Moderate | Strong | Strong | Strong   | Not Applicable | STRONG   |
| Law et al. 2014                | S88 | Strong   | Moderate | Strong | Strong | Strong   | Not Applicable | STRONG   |
| Perron et al. 2013             | S89 | Strong   | Moderate | Strong | Strong | Strong   | Not Applicable | STRONG   |
| Sinyor et al. 2010             | S90 | Strong   | Moderate | Strong | Strong | Strong   | Not Applicable | STRONG   |
| Sinyor et al. 2016             | S91 | Strong   | Moderate | Strong | Strong | Strong   | Not Applicable | STRONG   |
| Matsubayashi et al. 2013       | S92 | Strong   | Moderate | Strong | Strong | Moderate | Not Applicable | MODERATE |

|                                 |      |        |          |        |        |        |                |          |
|---------------------------------|------|--------|----------|--------|--------|--------|----------------|----------|
| Matsubayashi, Swada, Ueda. 2014 | S93  | Strong | Moderate | Strong | Strong | Strong | Not Applicable | STRONG   |
| Ueda et al. 2015                | S94  | Strong | Moderate | Strong | Strong | Weak   | Not Applicable | MODERATE |
| Beautrais et al. 2009           | S95  | Strong | Moderate | Strong | Strong | Strong | Not Applicable | STRONG   |
| Skegg et al. 2009               | S96  | Strong | Moderate | Strong | Strong | Strong | Not Applicable | STRONG   |
| Chung et al. 2016               | S97  | Strong | Moderate | Strong | Strong | Strong | Not Applicable | STRONG   |
| Reisch et al. 2005              | S98  | Strong | Moderate | Strong | Strong | Strong | Not Applicable | STRONG   |
| Hemmer et al. 2017              | S99  | Strong | Moderate | Strong | Strong | Strong | Not Applicable | STRONG   |
| Bennewith et al. 2007           | S100 | Strong | Moderate | Weak   | Strong | Strong | Not Applicable | MODERATE |
